Original Article

# Real-world use of osimertinib for epidermal growth factor receptor T790M-positive non-small cell lung cancer in Japan

Yuichiro Ohe<sup>1,\*</sup>, Terufumi Kato<sup>2</sup>, Fumikazu Sakai<sup>3</sup>,  
Masahiko Kusumoto<sup>4</sup>, Masahiro Endo<sup>5</sup>, Yoshinobu Saito<sup>6</sup>,  
Tomohisa Baba<sup>7</sup>, Masafumi Sata<sup>8</sup>, Ou Yamaguchi<sup>9</sup>, Kei Sakamoto<sup>10</sup>,  
Masatoshi Sugeno<sup>10</sup>, Reiko Tamura<sup>10</sup>, Toshimitsu Tokimoto<sup>10</sup>,  
Wataru Shimizu<sup>11</sup>, and Akihiko Gemma<sup>6</sup>

<sup>1</sup>Department of Thoracic Oncology, National Cancer Center Hospital, Tokyo, Japan, <sup>2</sup>Department of Thoracic Oncology, Kanagawa Cancer Center, Kanagawa, Japan, <sup>3</sup>Department of Diagnostic Radiology, Saitama Medical University International Medical Center, Saitama, Japan, <sup>4</sup>Department of Diagnostic Radiology, National Cancer Center Hospital, Tokyo, Japan, <sup>5</sup>Division of Diagnostic Radiology, Shizuoka Cancer Center, Shizuoka, Japan, <sup>6</sup>Department of Pulmonary Medicine and Oncology, Nippon Medical School, Tokyo, Japan, <sup>7</sup>Department of Respiratory Medicine, Kanagawa Cardiovascular and Respiratory Center, Kanagawa, Japan, <sup>8</sup>Division of Pulmonary Medicine, Department of Medicine, Jichi Medical University, Tochigi, Japan, <sup>9</sup>Department of Respiratory Medicine, Saitama Medical University International Medical Center, Saitama, Japan, <sup>10</sup>Research & Development, AstraZeneca K.K., Osaka, Japan, and <sup>11</sup>Department of Cardiovascular Medicine, Nippon Medical School, Tokyo, Japan

\*For reprints and all correspondence: Yuichiro Ohe, Department of Thoracic Oncology, National Cancer Center Hospital, 5-1-1, Tsukiji, Chuo-ku, Tokyo 104-0045, Japan. E-mail: yohe@ncc.go.jp

The data reported in this article were previously presented, in part, at the 59th Annual Meeting of the Japanese Respiratory Society, 12–14 April 2019, Tokyo, Japan; the Japanese Society of Medical Oncology Annual Meeting, 18–20 July 2019, Kyoto, Japan; and the 2019 World Conference on Lung Cancer, 7–10 September 2019, Barcelona, Spain.

Received 6 February 2020; Editorial Decision 27 April 2020; Accepted 1 May 2020

## Abstract

**Objective:** Adverse drug reactions (ADRs) during real-world osimertinib use were investigated in Japan.

**Methods:** Patients with epidermal growth factor receptor (EGFR) T790M-positive non-small cell lung cancer treated with second-line or later oral osimertinib per the Japanese package insert (80 mg once daily) were included. Data were collected between 28 March 2016 and 31 August 2018.

**Results:** The median observation period in the safety analysis population ( $n = 3578$ ) was 343.0 days. ADRs (defined as adverse events whose causality to osimertinib could not be denied by the attending physicians or manufacturer) were reported in 58.1% (2079/3578) of patients. ADRs of interstitial lung disease events were reported in 6.8% (245/3578; Grade  $\geq 3$ , 2.9% [104/3578]) of patients, of whom 29 (11.8%) died (0.8% of patients overall). ADRs of QT interval prolonged, liver disorder and haematotoxicity were reported in 1.3% (45/3578; Grade  $\geq 3$ , 0.1% [5/3578]), 5.9% (212/3578; Grade  $\geq 3$ , 1.0% [35/3578]) and 11.4% (409/3578; Grade  $\geq 3$ , 2.9% [104/3578]) of patients, respectively. In the efficacy analysis population ( $n = 3563$ ), 119 (3.3%) patients had complete

responses, 2373 (66.6%) had partial responses and 598 (16.8%) had stable disease. The objective response rate was 69.9%; disease control rate was 86.7%; and median progression-free survival (PFS) was 12.3 months. At 6 and 12 months, PFS rates were 77.4% (95% confidence interval [CI], 75.9–78.9) and 53.2% (95% CI, 51.3–55.1) and overall survival rates were 88.3% (95% CI, 87.2–89.4) and 75.4% (95% CI, 73.8–77.0), respectively.

**Conclusions:** These data support the currently established benefit-risk assessment of osimertinib in this patient population.

**Key words:** non-small cell lung cancer, epidermal growth factor receptor, osimertinib, safety, treatment outcome

## Introduction

Lung cancer is the most commonly diagnosed form of cancer worldwide and is the leading cause of cancer mortality (1). The incidence and prevalence are particularly high in Asian countries (1,2). Agents targeting the epidermal growth factor receptor (EGFR) are the current mainstay of treatment for non-small cell lung cancer (NSCLC); however, resistance eventually develops to these EGFR-tyrosine kinase inhibitors (TKIs) due to the development of acquired mutations, with T790M observed in ~50% of cases (3,4).

Osimertinib is a third-generation, irreversible, oral EGFR-TKI (5) that inhibits EGFR-TKI sensitizing (EGFRm) and T790M resistance mutations (6–11). Results from the randomized, open-label, phase III AURA3 study in patients with NSCLC who had progressed during first-line EGFR-TKI therapy showed that osimertinib provided significantly greater efficacy in terms of progression-free survival (PFS) (10.1 vs. 4.4 months in median PFS; hazard ratio [HR] after adjustment for Asian or non-Asian race, 0.30; 95% confidence interval [CI], 0.23–0.41;  $P < 0.001$ ) (7). A statistically significant improvement in overall survival (OS) between treatment with osimertinib vs. platinum therapy plus pemetrexed was not observed (26.8 vs. 22.5 months, respectively; HR, 0.87; 95% CI, 0.67–1.12;  $P = 0.277$ ) (12). PFS results were consistent within the Japanese subpopulation (13). In the multicentre, double-blind, phase III FLAURA study in treatment-naïve patients, globally, osimertinib significantly improved OS (11) and PFS (8) compared with the standard-of-care, gefitinib or erlotinib (OS 38.6 vs. 31.8 months, respectively; HR, 0.80; 95.05% CI, 0.64–1.00;  $P = 0.046$ ; median PFS 18.9 vs. 10.2 months; HR, 0.46; 95% CI, 0.37–0.57;  $P < 0.001$ ). The first-line PFS results were also recently confirmed in the Japanese subpopulation of the FLAURA study (median PFS with osimertinib 19.1 months vs. gefitinib 13.8 months; HR, 0.61; 95% CI, 0.38–0.99) (14) and were consistent with data from a treatment-naïve cohort of the AURA study (median PFS with osimertinib 22.1 months) (15).

Osimertinib was approved in Japan on 28 March 2016 for the second- or later-line treatment of patients with EGFR T790M mutation-positive NSCLC, who had progressed on prior EGFR-TKIs (16). Osimertinib was subsequently approved as first-line therapy in 2018 (17).

The Japan-local all-patient Clinical Experience Investigation (CEI) was initiated as part of the post-marketing activities in patients receiving treatment in the second-line or later setting, as required by pharmaceutical regulatory rules. The objectives of the CEI were to collect information regarding the development of adverse drug reactions (ADRs) during the real-world use of osimertinib; to investigate factors that may affect the safety and efficacy outcomes resulting from the use of osimertinib; to investigate the occurrence of interstitial lung diseases (ILDs); and to record any unexpected ADRs or new safety concerns associated with osimertinib treatment that are not already included in the Japanese package insert (16).

## Materials and methods

### Study design and patients

This was a post-marketing investigation (ClinicalTrials.gov Identifier: NCT02756039) conducted at 718 hospitals in Japan between 28 March 2016 (date of Japanese regulatory approval) and 31 August 2018 (data cutoff date). An early access program (EAP) was conducted at 37 sites between the approval date and 24 May 2016 (launch date); patients who participated in the EAP were retrospectively enrolled into the CEI after launch. The remaining patients were all those enrolled after launch. The planned study observation period was 12 months, with formal data collection using case report forms (CRFs). The planned sample size was 3000 patients who received treatment with osimertinib second-line or later according to the approved indication at the start of the investigation, namely, EGFR T790M mutation-positive inoperable or recurrent NSCLC resistant to EGFR-TKIs. Of note, this differs from the current indication in Japan, which is ‘inoperable or recurrent EGFR gene mutation-positive NSCLC’ (16).

All patients were enrolled by a central registration system, and there were no inclusion or exclusion criteria (as the name suggests, all-patient investigations must include all patients registered, regardless of indication; patients with the approved indication and with evaluable data are then selected for safety and efficacy analyses). As this was a post-marketing study, it was not necessary to obtain approval from an ethical review board or patient informed consent, based on Japanese regulatory guidelines for Good Post-marketing Surveillance Practice (18). Data underlying the findings described in this manuscript may be obtained in accordance with AstraZeneca’s data sharing policy described at <http://astrazenecagrouptrials.pharmacm.com/ST/Submission/Disclosure>.

### Treatment

Patients were treated with oral osimertinib according to the Japanese package insert (16), which states that the usual adult dosage is 80 mg once daily (QD); the dosage should be adjusted, where necessary, according to the patient’s condition.

### Outcome measures

Adverse events (AEs) were recorded using preferred terms (PTs) from the Japanese Medical Dictionary for Regulatory Activities (MedDRA/J) version 21.0. AEs whose causality to osimertinib could not be denied by the attending physicians or the manufacturer (AstraZeneca, Cambridge, United Kingdom) were reported as ADRs for this CEI; thus, ADRs in this report included those in which the causal relationship may be unclear due to insufficient information. Similarly, ADRs with the outcome of death included events for which a relationship to osimertinib could not be ruled out or events not attributable to ADRs but which nonetheless resulted in death.

**Table 1.** Patient demographic data and disease characteristics (safety analysis population)

| Characteristic                                  | Patients <i>n</i> = 3578,<br><i>n</i> (%) |
|-------------------------------------------------|-------------------------------------------|
| Age, years                                      |                                           |
| <65                                             | 1005 (28.1)                               |
| ≥65                                             | 2573 (71.9)                               |
| Sex                                             |                                           |
| Male                                            | 1207 (33.7)                               |
| Female                                          | 2371 (66.3)                               |
| BMI, kg/m <sup>2</sup>                          |                                           |
| <18.5                                           | 883 (24.7)                                |
| ≥18.5–<25                                       | 2023 (56.5)                               |
| ≥25–<30                                         | 355 (9.9)                                 |
| ≥30                                             | 45 (1.3)                                  |
| No data                                         | 272 (7.6)                                 |
| Smoker                                          |                                           |
| No                                              | 2513 (70.2)                               |
| Yes                                             | 1063 (29.7)                               |
| No data                                         | 2 (0.1)                                   |
| WHO PS                                          |                                           |
| ≤1                                              | 2904 (81.2)                               |
| ≥2                                              | 674 (18.8)                                |
| Treatment line                                  |                                           |
| ≤3                                              | 1794 (50.1)                               |
| ≥4                                              | 1760 (49.2)                               |
| Unknown                                         | 24 (0.7)                                  |
| EGFR mutation test performed                    |                                           |
| No                                              | 5 (0.1)                                   |
| Yes                                             | 3564 (99.6)                               |
| Specimen for EGFR mutation test <sup>a</sup>    |                                           |
| Lung (histology sample)                         | 1487 (41.6)                               |
| Lung (cytology sample)                          | 365 (10.2)                                |
| Organ other than lung                           | 733 (20.5)                                |
| Plasma                                          | 335 (9.4)                                 |
| Other liquid sample                             | 759 (21.2)                                |
| EGFR mutation status <sup>a</sup>               |                                           |
| T790M <sup>b</sup>                              | 3466 (96.9)                               |
| Exon 19 deletion                                | 1761 (49.2)                               |
| L858R                                           | 1243 (34.7)                               |
| Others                                          | 88 (2.5)                                  |
| Unknown                                         | 9 (0.3)                                   |
| Clinical stage                                  |                                           |
| IIIB                                            | 142 (4.0)                                 |
| IV                                              | 3086 (86.2)                               |
| Other                                           | 350 (9.8)                                 |
| Histology at the time of diagnosis <sup>a</sup> |                                           |
| Adenocarcinoma                                  | 3524 (98.5)                               |
| Squamous cell carcinoma                         | 29 (0.8)                                  |
| Large cell carcinoma                            | 5 (0.1)                                   |
| Others                                          | 26 (0.7)                                  |

*Continued*

As per the Japan-local risk management plan of osimertinib, important identified risks included ADRs of ILD-related events, QT interval prolonged, liver disorder and haematotoxicity; important potential risks included ADRs of cardiac disorders (excluding QT interval prolonged), infection, thromboembolism and corneal disorders. Time to first onset of the important identified risks was also evaluated.

**Table 1.** Continued

| Characteristic                  | Patients <i>n</i> = 3578,<br><i>n</i> (%) |
|---------------------------------|-------------------------------------------|
| Prior anticancer drug treatment |                                           |
| No                              | 38 (1.1)                                  |
| Yes <sup>a</sup>                | 3540 (98.9)                               |
| EGFR-TKI                        | 3492 (97.6)                               |
| Gefitinib                       | 2471 (69.1)                               |
| Erlotinib hydrochloride         | 1750 (48.9)                               |
| Afatinib maleate                | 1138 (31.8)                               |
| Chemotherapy                    | 2271 (63.5)                               |
| Immuno-checkpoint inhibitor     | 288 (8.0)                                 |
| Others                          | 1204 (33.7)                               |
| History of lung surgery         |                                           |
| No                              | 2458 (68.7)                               |
| Yes                             | 1120 (31.3)                               |
| History of lung radiotherapy    |                                           |
| No                              | 3325 (92.9)                               |
| Yes                             | 253 (7.1)                                 |

Abbreviations: BMI, body mass index; EGFR, epidermal growth factor receptor; TKI, tyrosine kinase inhibitor; WHO PS, World Health Organization performance status.

<sup>a</sup>Patients can be counted multiple times if applicable to multiple categories.

<sup>b</sup>In this post-marketing investigation, the registration form was used as the primary source for evaluating patient eligibility for treatment with osimertinib per the Japanese package insert for second- or later-line treatment settings. However, the data collected from the case report forms included additional data to that obtained from the registration form. There remain some inconsistencies in the data between the registration form and case report forms. The data reported in this table are consistent with that collected from the case report forms.

As this was an observational investigation of real-world clinical experience, the timing of computed tomography (CT) image evaluation could not be stipulated. The efficacy outcomes of this analysis were adjudicated by the attending physician referring to Response Evaluation Criteria In Solid Tumours (RECIST) version 1.1. These included best overall response (complete response [CR], partial response [PR] or stable disease [SD]), objective response rate (ORR; CR + PR) and disease control rate (DCR; CR + PR + SD). PFS and OS were also evaluated.

### Statistical methods

The planned sample size of 3000 was determined to ensure that sufficient patients were included in the CEI for evaluating factors potentially associated with the incidence of ILD in the real-world clinical use setting, rather than for overall safety or efficacy. However, no ILD data directly relevant to the sample size rationale were included in this report. There were several statistical considerations for the sample size calculation. These included a 3:1 ratio of subjects at high and low risk, respectively, of developing ILD; an ILD incidence rate of 4% in the low-risk group; and an odds ratio of developing ILD for the high-risk:low-risk groups of 2.0. Using these assumptions, ~2200 patients were needed to achieve 90% power to detect the difference between groups, with a two-sided significance level of 5%. To allow for variability in the ratio of patients in the low- and high-risk groups with respect to some risk factors of ILD, the target sample size was set at 3000 patients.

The analysis sets were defined based on pre-specified case-handling criteria. The safety population comprised all enrolled

patients who received osimertinib administration, completed at least one clinic visit after treatment initiation and had CRF data (with a safety evaluation) available, with the exception of patients violating the contract or registration to the CEI, duplicated patients and patients who had previously been treated with osimertinib. The efficacy population was the same as the safety population, with the exception of patients who did not use the drug for the approved indication (for the indication at the time of study initiation, see section 'Study design and patients') which was subject to re-examination by the Japanese regulatory agency, those who used the drug outside of the approved dosage or administration method and those without an efficacy evaluation, all of whom were not included in the efficacy analyses.

Patient demographic data, safety data and efficacy data were reported descriptively. When multiple ADRs of the same kind developed in one patient, the events were counted once for each patient. Efficacy outcomes were evaluated according to background patient factors, including age, the World Health Organization performance status (WHO PS), EGFR mutation status, central nervous system (CNS) metastasis and pleural effusion. The Clopper–Pearson exact method was used to calculate the 95% CI for ORR and DCR. PFS and OS were analysed using Kaplan–Meier methodology. Subgroup analyses of ORR, DCR and PFS were conducted for selected patient demographic and disease characteristics. No imputation was made for missing data. Statistical analyses were performed using SAS software version 9.4 (SAS Institute, Cary, NC, USA).

## Results

### Patients

The patient disposition is shown in Fig. 1. Data were collected from a total of 3629 patients between 28 March 2016 and 31 August 2018, of whom 3578 were included in the safety analysis population and 3563 were included in the efficacy analysis population. The majority of patients ( $n = 43$ ) excluded from the safety analysis population had previously received osimertinib. The majority of patients ( $n = 10$ ) excluded from the efficacy analysis population had used osimertinib outside of the approved indication at the time of study initiation (see section 'Study design and patients').

Table 1 summarizes patient demographic data and disease characteristics. Two-thirds of patients were female (66.3%), and 71.9% were aged  $\geq 65$  years. More than two-thirds of patients were non-smokers (70.2%), and the majority had WHO PS  $\leq 1$  (81.2%) and stage IV disease (86.2%). Around half of patients were receiving osimertinib as second- or third-line therapy and half as fourth- or later-line.

The median observation period for patients in the safety analysis set was 343.0 days (range: 1–764).

### ADRs

ADRs were reported in 58.1% (2079/3578) of patients (Table 2). Thirty percent (624/2079) of patients with an ADR were reported to have recovered, and 39.7% (825/2079) were reported to be improving. The outcome for 52 patients with ADRs was death (2.5% [52/2079]), corresponding to 1.5% of the 3578 patients in the safety analysis population. The outcomes were unknown for 22 patients (1.1% [22/2079]).

Table 3 shows details of key ADRs reported in this analysis. The most frequently reported ADRs were diarrhoea (10.9% [390/3578]) and paronychia (10.3% [370/3578]). ILD events were reported

**Table 2.** ADRs and outcomes (safety analysis population)

| ADR <sup>a</sup>               | Patients $n = 3578$                                   |
|--------------------------------|-------------------------------------------------------|
| Number of patients (%)         | 2079 (58.1)                                           |
| Number of events <sup>b</sup>  | 4255                                                  |
| Outcome <sup>c</sup> , $n$ (%) | (Percentage based on patients with ADRs, $n = 2079$ ) |
| Recovered                      | 624 (30.0)                                            |
| Improving                      | 825 (39.7)                                            |
| Still present                  | 547 (26.3)                                            |
| Recovered with sequelae        | 9 (0.4)                                               |
| Death                          | 52 (2.5) <sup>d</sup>                                 |
| Unknown                        | 22 (1.1)                                              |

Abbreviation: ADR, adverse drug reaction.

The number of patients (%) with ADR was calculated based on the safety analysis population. Outcome data were calculated based on the number of patients reporting an ADR.

<sup>a</sup>ADRs include adverse events for which causality to osimertinib could not be denied by the attending physician or drug manufacturer (AstraZeneca, Cambridge, United Kingdom).

<sup>b</sup>If multiple events of the same kind (at preferred term level) were observed within a patient, they were counted as one event in the table.

<sup>c</sup>When multiple ADRs were observed within a patient, outcome was chosen based on the following priority: death > recovered with sequelae > still present > improving > recovered. When the outcome of an event was unknown, the event was not included in the priority judgement. Only when the outcomes of all events were unknown for a given patient, the patient was reported as 'unknown'.

<sup>d</sup>The percentage of patients with ADRs with fatal outcome in the overall safety analysis population was 1.5% (52/3578).

in 6.8% (245/3578) of patients, of which 2.9% (104/3578) were Grade  $\geq 3$ . Of the 245 patients who developed ILD, 29 (11.8%) died. This corresponds to 0.8% of the 3578 patients in the safety analysis population. ADRs of QT interval prolonged, liver disorder and haematotoxicity were reported in 1.3% (45/3578; Grade  $\geq 3$ , 0.1% [5/3578]), 5.9% (212/3578; Grade  $\geq 3$ , 1.0% [35/3578]) and 11.4% (409/3578; Grade  $\geq 3$ , 2.9% [104/3578]) of patients, respectively.

The time to onset of key ADRs is illustrated in Fig. 2. The median onset of haematotoxicity following osimertinib initiation was 14.0 days from the first dose, whereas ILD and QT interval prolonged were reported at  $\sim 2$  months after the first dose.

Additional key safety results are shown in Table 3. Grade  $\geq 3$  events of diarrhoea, skin disorder or paronychia each occurred in  $< 1\%$  of patients.

### Efficacy outcomes

Of the 3563 patients in the efficacy analysis population, 119 (3.3%) had CR, 2373 (66.6%) had PR and 598 (16.8%) had SD. The ORR was 69.9% (2492/3563; 95% CI, 68.4–71.4). The DCR was 86.7% (3090/3563; 95% CI, 85.6–87.8).

Efficacy outcomes according to background patient factors are shown in Table 4. The ORR and DCR were higher in patients with WHO PS 0–1 (compared with PS 2–4) and in patients without CNS metastasis or with asymptomatic CNS metastasis (compared with patients with symptomatic CNS metastasis). The ORR and DCR were slightly higher in patients without pleural effusion. No notable differences were observed according to age or EGFR mutation.

PFS and OS Kaplan–Meier curves are shown in Figs 3 and 4. In the overall population, median PFS was 12.3 months (95% CI,

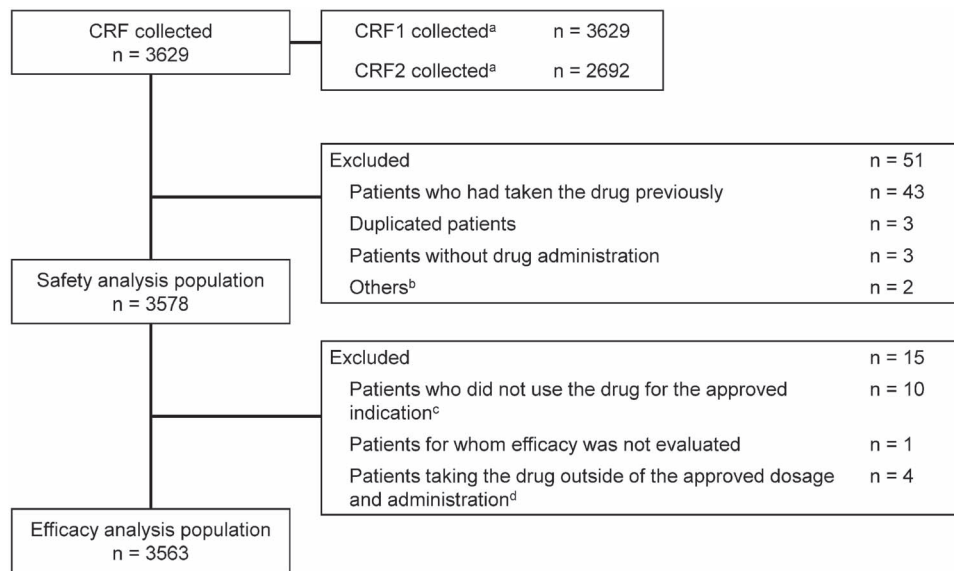

**Figure 1.** Patient disposition. Abbreviations: CRF, case report form; EGFR, epidermal growth factor receptor. <sup>a</sup>The observation period was 12 months. The data up to 3 months after osimertinib was started were entered in CRF1. Any additional data after 3 months of osimertinib treatment were entered in CRF2. <sup>b</sup>Included patients who started treatment prior to study registration. <sup>c</sup>The indication in the osimertinib package insert at the start of the investigation was EGFR T790M mutation-positive inoperable or recurrent non-small cell lung cancer resistant to EGFR-tyrosine kinase inhibitors. <sup>d</sup>The dosage and administration in the osimertinib package insert were ‘Normally, orally administer 80 mg of osimertinib once daily in adults. Lower the dose as appropriate according to the patient’s condition’ (16).

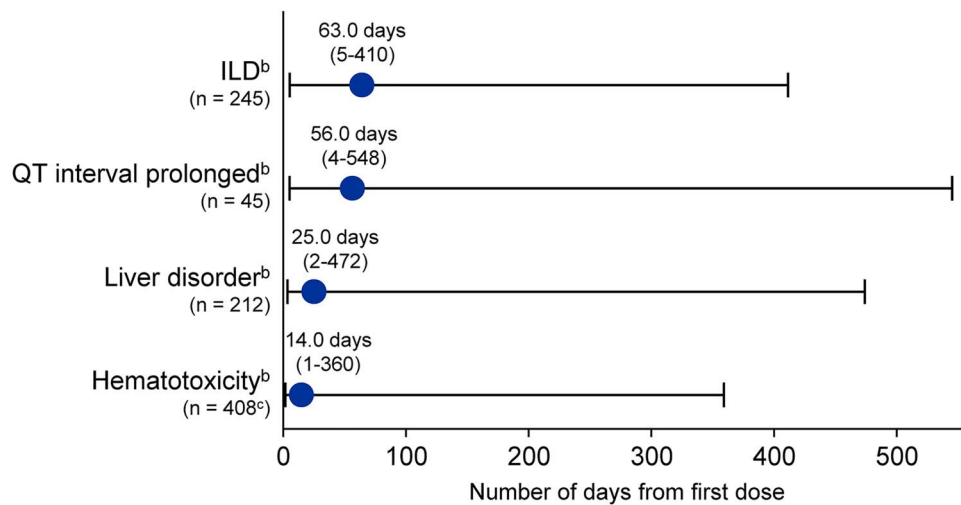

**Figure 2.** Median (range) time to onset of key ADRs<sup>a</sup> (safety analysis population). Abbreviations: ADR, adverse drug reaction; AE, adverse event; ECG, electrocardiogram; ILD, interstitial lung disease; MedDRA, Medical Dictionary for Regulatory Activities; PT, preferred term. <sup>a</sup>AEs whose causality to osimertinib could not be denied by the attending physicians or drug manufacturer (AstraZeneca, Cambridge, United Kingdom). <sup>b</sup>Grouped term based on investigator-reported AEs (not including laboratory/ECG abnormalities that were not reported by investigator). ILD (investigator assessment) includes the following PTs (per MedDRA/J version 21.0): alveolitis, idiopathic pulmonary fibrosis, interstitial lung disease, lung disorder, pneumonitis, pulmonary fibrosis, diffuse alveolar damage, pulmonary toxicity, acute interstitial pneumonitis, acute respiratory distress syndrome, organizing pneumonia and acute lung injury. <sup>c</sup>Data for the number of days from first dose were missing for one patient with haematotoxicity.

12.2–12.6), and PFS rates at 6 and 12 months were 77.4% (95% CI, 75.9–78.9) and 53.2% (95% CI, 51.3–55.1), respectively (Fig. 3A). When PFS rates were stratified by different patient demographics and disease characteristics (Fig. 3B–F), median PFS was longer in patients aged ≥75 years than in younger patients (Fig. 3B), in those with WHO PS 0–1 than in those with PS 2–4 (Fig. 3C), and in patients with no or asymptomatic CNS metastasis than in those with symptomatic CNS metastasis (Fig. 3E). OS rates at 6 and 12 months were 88.3%

(95% CI, 87.2–89.4) and 75.4% (95% CI, 73.8–77.0), respectively (Fig. 4).

### Discussion

Although the introduction of EGFR-TKIs into the treatment paradigm for NSCLC improved clinical outcomes for patients (4,19), these agents are associated with several kinds of ADRs, particularly

**Table 3.** Summary of safety outcomes (safety analysis population)

| Event                                                                | Patients <i>n</i> = 3578, <i>n</i> (%) |
|----------------------------------------------------------------------|----------------------------------------|
| Patients with ADR <sup>a</sup>                                       | 2079 (58.1)                            |
| Most frequently reported ADRs ( $\geq 5\%$ of patients) <sup>b</sup> |                                        |
| Diarrhoea                                                            | 390 (10.9)                             |
| Paronychia                                                           | 370 (10.3)                             |
| Rash                                                                 | 304 (8.5)                              |
| Platelet count decreased                                             | 221 (6.2)                              |
| Decreased appetite                                                   | 207 (5.8)                              |
| Interstitial lung disease                                            | 197 (5.5)                              |
| Important identified risks <sup>c,d</sup>                            |                                        |
| ILD <sup>e</sup> (grouped term)                                      | 245 (6.8) <sup>f</sup>                 |
| QT interval prolonged <sup>g</sup>                                   | 45 (1.3)                               |
| Liver disorder <sup>h</sup>                                          | 212 (5.9)                              |
| Haematotoxicity <sup>i</sup>                                         | 409 (11.4)                             |
| Important potential risks <sup>c,d</sup>                             |                                        |
| Cardiac disorder (excluding QT interval prolonged) <sup>j</sup>      | 101 (2.8)                              |
| Infection <sup>k</sup>                                               | 79 (2.2)                               |
| Thromboembolism <sup>l</sup>                                         | 45 (1.3)                               |
| Corneal disorder <sup>m</sup>                                        | 20 (0.6)                               |
| Other priority surveillance items                                    |                                        |
| Grade $\geq 3$ diarrhoea                                             | 25 (0.7)                               |
| Grade $\geq 3$ skin disorder <sup>d,n</sup>                          | 26 (0.7)                               |
| Grade $\geq 3$ paronychia <sup>d,o</sup>                             | 16 (0.4)                               |

Abbreviations: ADR, adverse drug reaction; ILD, interstitial lung disease; MedDRA/J, Japanese Medical Dictionary for Regulatory Activities; PT, preferred term; SOC, system organ class; SMQ, standardized MedDRA query.

<sup>a</sup>Adverse events for which causality to osimertinib could not be denied by attending physicians or drug manufacturer (AstraZeneca, Cambridge, United Kingdom).

<sup>b</sup>MedDRA/J version.21.0 preferred term.

<sup>c</sup>Safety specification based on the Japanese risk management plan.

<sup>d</sup>Grouped term based on investigator-reported adverse events (not including laboratory/electrocardiogram abnormalities which were not reported by the investigator).

<sup>e</sup>ILD (grouped term) includes the following PTs (per MedDRA/J version 21.0): alveolitis, idiopathic pulmonary fibrosis, interstitial lung disease, lung disorder, pneumonitis, pulmonary fibrosis, diffuse alveolar damage, pulmonary toxicity, acute interstitial pneumonitis, acute respiratory distress syndrome, organizing pneumonia and acute lung injury.

<sup>f</sup>Out of 245 patients with ILD (grouped term), 29 patients (11.8%) died.

<sup>g</sup>QT interval prolonged includes the PTs reported among the following terms: electrocardiogram QT interval abnormal, long QT syndrome congenital, long QT syndrome and electrocardiogram QT prolonged.

<sup>h</sup>Liver disorder includes the PTs reported among the following terms: alanine aminotransferase increased, aspartate aminotransferase increased, blood bilirubin increased, hepatic function abnormal, liver disorder, drug-induced liver injury and hyperbilirubinaemia.

<sup>i</sup>Haematotoxicity includes the PTs reported among the following terms: anaemia, leukopenia, neutropenia, neutrophil count decreased, platelet count decreased, thrombocytopenia and white blood cell count decreased.

<sup>j</sup>Cardiac disorder (excluding QT interval prolonged) includes PTs reported among the following terms: cardiac disorders (SOC), cardiac failure (SMQ) and cardiomyopathy (SMQ) excluding grouped term of QT interval prolonged.

<sup>k</sup>Infection includes PTs reported among the following terms: infections and infestations (SOC) excluding PTs of paronychia, nail bed infection, nail infection, folliculitis and rash pustular.

<sup>l</sup>Thromboembolism includes PTs reported among the following terms: embolic and thrombotic events, arterial (SMQ); embolic and thrombotic events, venous (SMQ); embolic and thrombotic events, vessel type unspecified; and mixed arterial and venous (SMQ) and thrombophlebitis (SMQ).

<sup>m</sup>Corneal disorder includes PTs reported among the following terms: eye disorders (SOC).

<sup>n</sup>Skin disorder includes the following terms: eczema, dry skin, skin fissures, xeroderma, xerosis, pruritus, eyelids pruritus, pruritus generalized, rash, rash generalized, rash macular, rash maculopapular, rash maculovesicular, rash vesicular, rash follicular, acne pustular, rash pustular, folliculitis, eyelid folliculitis, acne, dermatitis, dermatitis acneiform, drug eruption, rash erythematous, rash papular, rash pruritic, skin erosion, erythema and eyelid rash.

<sup>o</sup>Paronychia includes the following terms: paronychia, nail bed infection, nail infection, nail bed inflammation, nail bed disorder, nail bed tenderness, nail discoloration, nail disorder, nail dystrophy, nail pigmentation, nail ridging, onycholysis, onychomadesis, onychomalacia and nail toxicity.

diarrhoea and rash (20–22). However, a recent network meta-analysis suggested that osimertinib provided an improved benefit-risk profile compared with other EGFR-TKIs (23).

The current analysis was a CEI initiated at the time of marketing approval in Japan for second- or later-line patients who progressed on or after EGFR-TKI treatment. The CEI aimed to

evaluate ADRs during real-world use of osimertinib and to examine the factors affecting safety and efficacy outcomes associated with osimertinib. During a median observation period of  $\sim 1$  year, the incidence of ADRs in this CEI was 58.1%. This was lower than the incidence reported from the Japanese subpopulation in the phase III AURA3 study after a median duration of osimertinib treatment of

**Table 4.** Efficacy according to background patient factors (efficacy analysis population)

| Factor               | <i>n</i> | ORR % (95% CI)   | DCR % (95% CI)   |
|----------------------|----------|------------------|------------------|
| All patients         | 3563     | 69.9 (68.4–71.4) | 86.7 (85.6–87.8) |
| Age, years           |          |                  |                  |
| <75                  | 2458     | 69.4 (67.6–71.3) | 86.2 (84.7–87.5) |
| ≥75                  | 1105     | 71.0 (68.3–73.7) | 88.0 (85.9–89.8) |
| WHO PS               |          |                  |                  |
| 0–1                  | 2895     | 73.6 (71.9–75.2) | 90.0 (88.8–91.1) |
| 2–4                  | 668      | 54.2 (50.3–58.0) | 72.6 (69.1–76.0) |
| EGFR mutation status |          |                  |                  |
| Exon 19 deletion     | 1757     | 72.5 (70.4–74.6) | 87.8 (86.2–89.3) |
| L858R                | 1233     | 67.1 (64.4–69.7) | 85.5 (83.4–87.4) |
| CNS metastasis       |          |                  |                  |
| Symptomatic          | 233      | 58.4 (51.8–64.8) | 78.5 (72.7–83.6) |
| Asymptomatic         | 601      | 69.7 (65.9–73.4) | 86.9 (83.9–89.5) |
| Absent               | 2729     | 71.0 (69.2–72.7) | 87.4 (86.1–88.6) |
| Pleural effusion     |          |                  |                  |
| Present              | 940      | 62.2 (59.0–65.3) | 83.4 (80.9–85.7) |
| Absent               | 2623     | 72.7 (71.0–74.4) | 87.9 (86.6–89.1) |

Abbreviations: CI, confidence interval; CNS, central nervous system; DCR, disease control rate; EGFR, epidermal growth factor receptor; ORR, overall response rate; WHO PS, World Health Organization performance status.

9.95 months, in which 39 patients (95.1%) treated with osimertinib and 22 patients (100%) treated with platinum-pemetrexed reported at least 1 AE considered at least possibly related to treatment (13). However, the patient numbers in the AURA3 sub-study were small ( $n = 41$  and  $22$ , respectively) (13). The incidences of important identified risks defined for this CEI per the requirements of the Japanese regulatory authority were similar to, or slightly lower than, those reported in AURA3. In this CEI, the incidences of haematotoxicity, ILD, liver disorder and QT prolongation were 11.4, 6.8, 5.9 and 1.3%, respectively. In AURA3, the incidences of haematotoxicity, ILD, liver disorder and QT prolongation were 4.9–12.2, 7.3, 12.2 and 2.4%, respectively (13).

Again, it must be remembered that our study was a large, real-world study and not a controlled clinical trial. However, when compared with the safety outcomes observed in ASTRIS, a global, real-world safety study of osimertinib in >3000 patients with NSCLC, the CEI tolerability profile was also similar, with no new safety signals observed (24). The incidence of ADRs resulting in death was 1.5% in this CEI, whereas the incidence of AEs resulting in death was 4.9% in ASTRIS. ADRs of ILD and QT interval prolonged were reported in 6.8 and 1.3% of the CEI patients, respectively. In ASTRIS, AEs of ILD and QT interval prolonged were reported in 0.9 and 2.5% of patients, respectively.

The development of EGFR-TKI-associated ILD is a common clinical problem with the use of first-generation agents (25, 26), with a higher susceptibility reported among Japanese patients (27). The ILD rate associated with osimertinib in this analysis was 6.8%, and fatal outcomes resulting from ILD occurred in 0.8% (11.8% of the ILD population). In post-marketing studies of gefitinib, erlotinib or afatinib, ILD rates ranging from 4.3 to 15.2% have been reported (28–30). In terms of ILD mortality rate, among the latter studies, the death rate from ILD was 1.5% (153/9909) (i.e. 35.7% of the ILD population who received erlotinib) (29) and 0.7% (12/1602) (i.e. 17.1% of the ILD population who received afatinib) (30). By comparison, ILD rates of 5.0–5.8% have been reported among Japanese patients treated with gefitinib or erlotinib in two clinical trials, both of which reported an ILD death rate of 1.0% (31,32).

In light of potential alternative causes or contributory factors in all the fatal outcomes of patients with ILD (including progression of the underlying lung cancer or rapid deterioration of the patient's medical condition, or other concomitant diseases, at the time of diagnosis of ILD), it is difficult to assess the extent to which ILD may contribute towards a fatal outcome, because the lack of autopsy reports precludes confirmation of the true causes of death in a majority of the fatal case reports. Individual case reports did not identify specific risk factors for fatal ILD.

The use of osimertinib in the CEI resulted in positive efficacy outcomes for patients with NSCLC. In reference to RECIST v1.1, the overall response rate was 69.9%, and the DCR was 86.7%; these results are comparable with those reported in the phase III AURA3 clinical trial in Japanese patients, in which the response rate was 70.7% and the DCR was 95.1% with osimertinib (13). They are also in line with those observed for patients globally; patients from the phase II AURA extension study had a response rate of 62% and a DCR of 90%, those from the phase II AURA2 trial had a 70% response rate and a 92% DCR and the AURA3 trial (all patients) reported a response rate and DCR of 71 and 93%, respectively (7,33,34). Furthermore, the data also support the levels of clinical activity observed in real-world treatment studies of osimertinib, such as ASTRIS (investigator-assessed response rate 57.1%) (24). Subgroup analysis in our study showed that ORR and DCR were similar between age groups and EGFR mutation status, whereas differences in ORR and DCR were observed in patients based on WHO PS and pleural effusion status. Moreover, patients without CNS metastasis or with asymptomatic CNS metastasis had similar ORRs and DCRs, while those with symptomatic CNS metastasis had lower respective ORR and DCR rates.

We observed an overall PFS of 12.3 months which is similar to that observed in both the global (10.1 months) and Japanese (12.5 months) populations in AURA3, the global phase II AURA2 trial (12.3 months) and global real-world study, ASTRIS (11.1 months) (7,13,24,33). The subgroup analysis of PFS according to patient factors also supported the clinical benefit of osimertinib in hard-to-treat populations. Elderly patients (≥75 years of age)

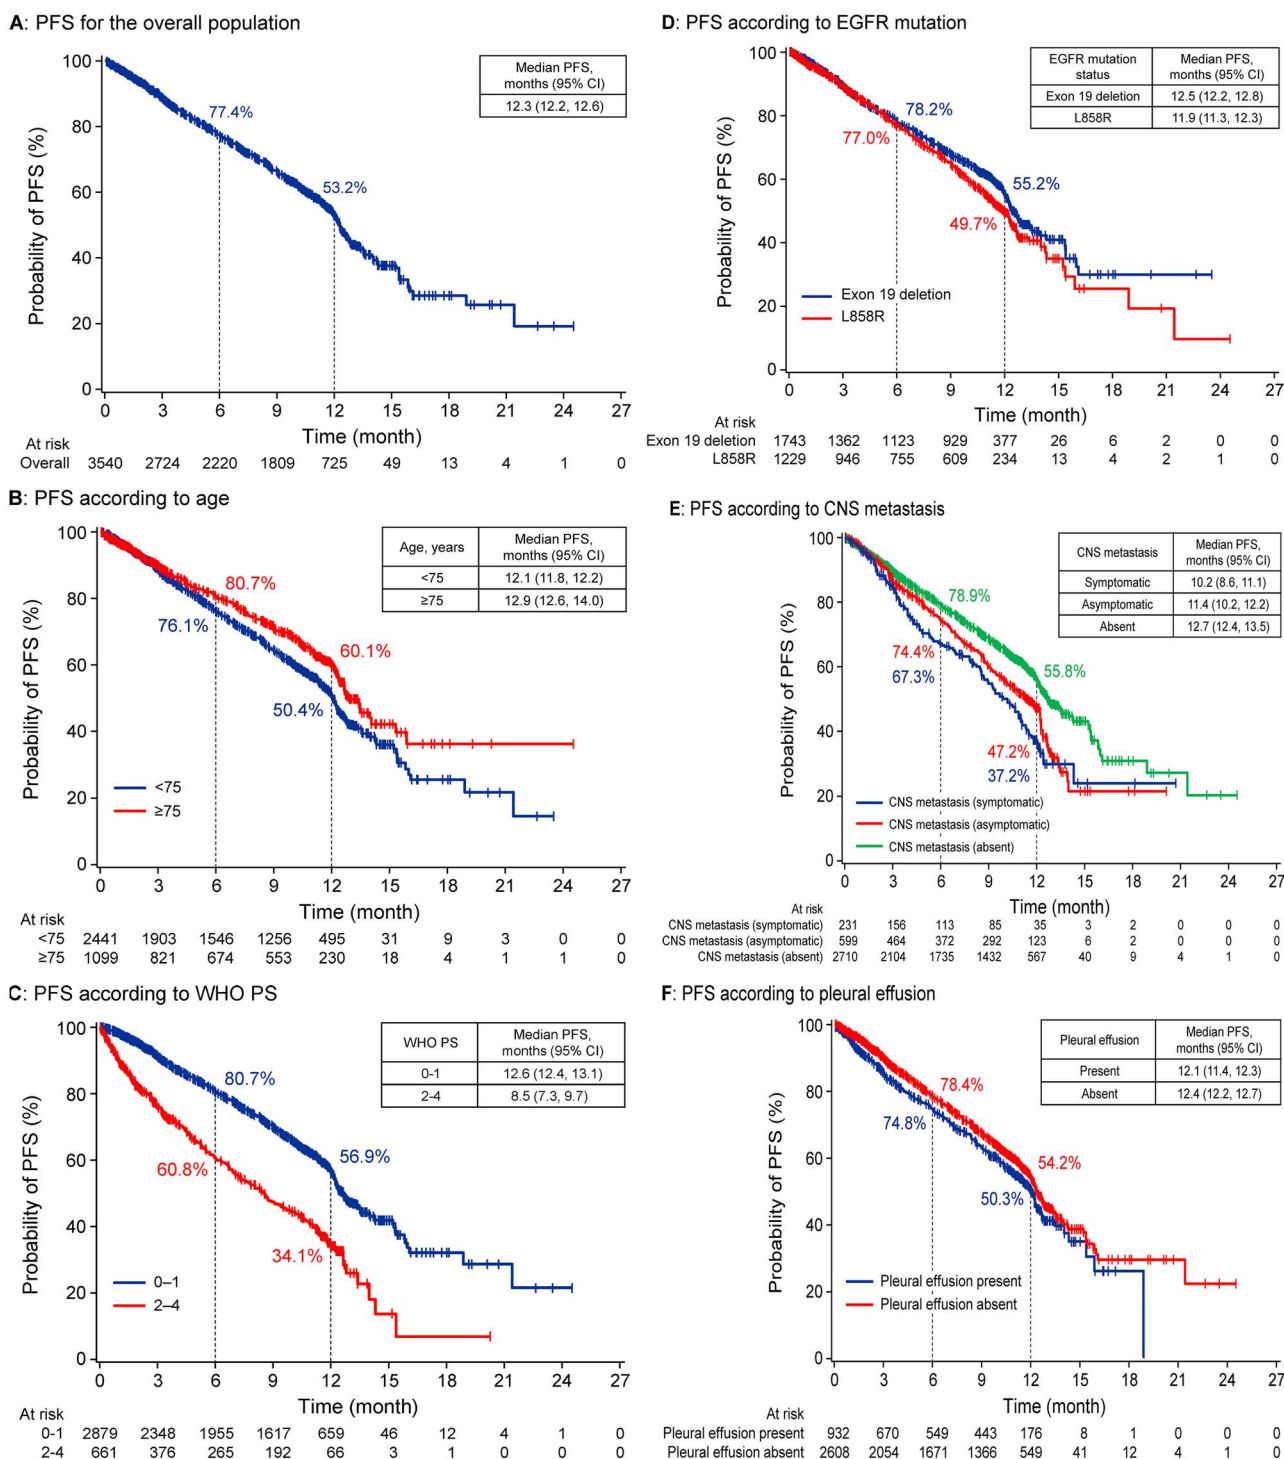

**Figure 3.** Progression-free survival rates<sup>a</sup> (efficacy analysis population). (A) PFS for the overall population. (B) PFS according to age. (C) PFS according to WHO PS. (D) PFS according to EGFR mutation. (E) PFS according to CNS metastasis. (F) PFS according to pleural effusion. Abbreviations: CI, confidence interval; CNS, central nervous system; EGFR, epidermal growth factor receptor; PFS, progression-free survival; WHO PS, World Health Organization performance status. <sup>a</sup>Evaluated by attending physicians in the real-world setting.

had a PFS of 12.9 months, demonstrating that osimertinib was effective regardless of age. The PFS of patients with WHO PS 0–1 was comparable with that reported for the Japanese patients in the AURA3 trial, in which all patients had a WHO PS 0–1 (12.6 and 12.5, respectively) (13). In patients with a poor PS (WHO

PS 2–4), osimertinib did provide clinical benefit in this patient subgroup (PFS: 8.5 months). This is slightly better than the PFS of 6.5 months reported for first-line gefitinib in patients with a poor performance status (as assessed by European Cooperative Oncology Group criteria) (35). Subgroup analysis in our study demonstrated



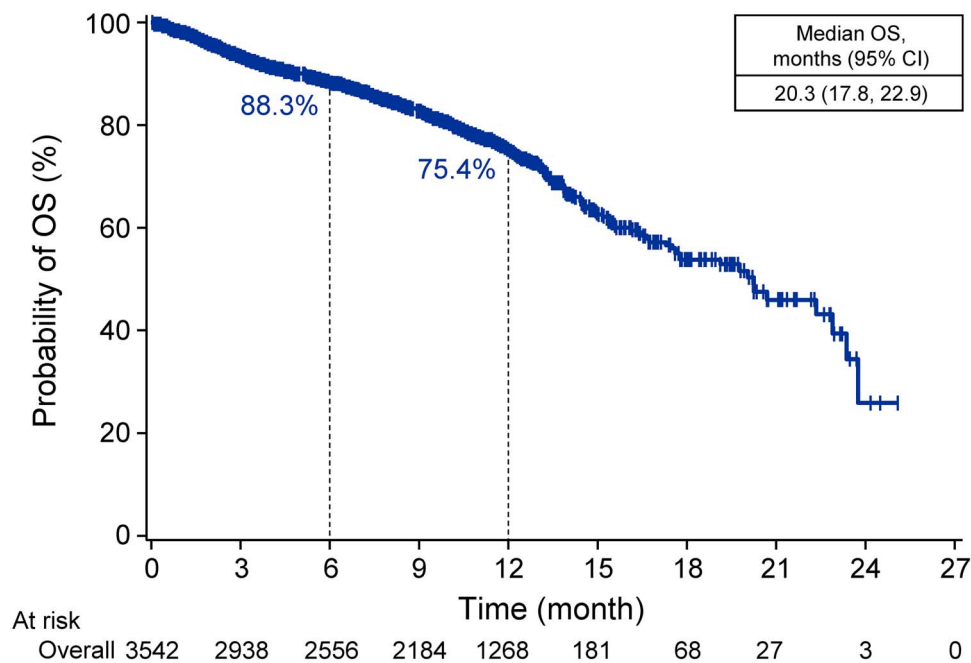

**Figure 4.** Overall survival (efficacy analysis population). Abbreviations: CI, confidence interval; OS, overall survival.

that patients with both symptomatic and asymptomatic CNS metastasis experienced clinical benefit (symptomatic, 10.2 months; asymptomatic, 11.4 months), in agreement with that reported for patients with asymptomatic CNS metastasis in the AURA3 trial (PFS, 8.5 months) (7). Osimertinib was effective regardless of EGFR mutation status or pleural effusion status. The data for elderly patients and those with poor PS have been lacking, as they have historically been excluded from clinical trials due to poor outcomes (36) and there is a clear need for new treatment options with proven clinical activity to improve the prognosis for these patients.

The results of this CEI confirm and expand the currently established benefit-risk assessment of osimertinib in patients with EGFR T790M-positive NSCLC and are expected to inform future therapeutic decision-making for patients who have traditionally had few available treatment options. However, this study has some limitations, including its single-arm, uncontrolled, observational design and that the lack of pre-specified patient selection criteria allowed enrolment of a heterogeneous population. Of the 3578 patients in the safety analysis population, a high proportion of them were female (2371 [66.3%]) or  $\geq 65$  years of age (2573 [71.9%]). Furthermore, there were no stringent schedules for visits or chest CT (e.g. every 6 weeks with confirmation of response as in a clinical trial), and there was a short observation period (pre-defined to be 1 year) for time-to-event analyses. This means that the PFS would be biased to be longer due to delays in the detection of progressive disease. Limitations related to safety were that, in this study, ADRs were reported, whereas AEs are the primary safety items reported in other studies; furthermore, the ADR definition used was unique to this CEI and may differ from other analyses, making it difficult to draw comparisons. In addition, important identified and potential risks defined for this CEI were specific to Japan-local situations per the requirement by the regulatory agency and may not hold true for osimertinib use globally. Finally, as described earlier, the events of ILD with a fatal outcome must be evaluated in the context of the patient's overall condition and the presence of other potential mortality-contributory factors.

However, this is the largest reported study to date of osimertinib in patients with T790M-positive NSCLC, and the study population is likely more representative of the Japanese NSCLC population than in a highly selected clinical trial, allowing the data to be extrapolated to the general clinical population. Furthermore, the results from this CEI are in line with previous clinical trial data, suggesting a robust evidence base for this agent overall.

In conclusion, in this large post-marketing investigation in >3500 Japanese patients with EGFR T790M-positive NSCLC, osimertinib 80 mg QD provided clinical benefit to patients with no new safety concerns. These results were comparable with clinical trial data and other real-world analyses of osimertinib in this patient population and support the currently established benefit-risk assessment of this important therapeutic agent.

## Acknowledgements

The authors wish to express their gratitude to all the physicians and staff who participated in the osimertinib use-results survey. The authors thank Sally-Anne Mitchell, PhD, and Sarah Bubeck, PhD, of Edanz Medical Writing for providing medical writing support, which was funded by AstraZeneca K.K., Osaka, Japan, through EMC K.K., in accordance with Good Publication Practice (GPP3) guidelines (<http://www.ismpp.org/gpp3>).

## Funding

This work was supported by AstraZeneca K.K., Osaka, Japan, per Japanese regulatory requirements.

## Conflict of interest statement

Yuichiro Ohe received fees from AstraZeneca, Chugai, Eli Lilly, Ono and Kyorin and research funds from AstraZeneca, Ono, Taiho, Chugai, Bristol-Myers Squibb, Kyorin, Sumitomo Dainippon, Kissei, Janssen, Loxo Oncology, Takeda and MSD. Terufumi Kato received

fees from AstraZeneca, Ono, MSD, Chugai, Boehringer Ingelheim and Eli Lilly. Fumikazu Sakai received fees from AstraZeneca, Ono, Bristol-Myers Squibb and Boehringer Ingelheim; manuscript fees from Boehringer Ingelheim; research funds from Bayer; and scholarship endowments from Daiichi Sankyo, Bayer, Fuji Yakuhin and Eisai. Masahiko Kusumoto received fees from Ono, AstraZeneca and MSD and research funds from Canon Medical Systems. Masahiro Endo received fees from AstraZeneca. Yoshinobu Saito received fees from AstraZeneca. Tomohisa Baba received fees from AstraZeneca and Ono. Masafumi Sata received fees from AstraZeneca. Ou Yamaguchi received fees from Ono, Bristol-Myers Squibb, Taiho, MSD, Chugai and AstraZeneca. Kei Sakamoto, Masatoshi Sugeno, Reiko Tamura and Toshimitsu Tokimoto are employed by AstraZeneca. Wataru Shimizu has no conflicts of interest. Akihiko Gemma received fees from AstraZeneca. All authors had full access to all of the data in the study and had final responsibility for the decision to submit for publication.

### Contributor statements

Yuichiro Ohe, Terufumi Kato, Fumikazu Sakai, Masahiko Kusumoto, Masahiro Endo, Yoshinobu Saito, Tomohisa Baba, Masafumi Sata, Ou Yamaguchi, Kei Sakamoto, Toshimitsu Tokimoto, Wataru Shimizu and Akihiko Gemma were involved in data interpretation and critical revision and final approval of the manuscript. Masatoshi Sugeno was involved in the conception and design of the study, data analysis and interpretation and critical revision and final approval of the manuscript. Reiko Tamura was involved in the conception and design of the study, data interpretation and critical revision and final approval of the manuscript. All authors agree to be accountable for the accuracy and integrity of this work.

### References

- Globocan 2018. *Lung Fact Sheet*. <https://gco.iarc.fr/today/data/factsheets/cancers/15-Lung-fact-sheet.pdf> (6 September 2019, date last accessed).
- Pakzad R, Mohammadian-Hafshejani A, Ghoncheh M, Pakzad I, Salehiniya H. The incidence and mortality of lung cancer and their relationship to development in Asia. *Transl Lung Cancer Res* 2015;4:763–74.
- Gao J, Li HR, Jin C, Jiang JH, Ding JY. Strategies to overcome acquired resistance to EGFR TKI in the treatment of non-small cell lung cancer. *Clin Transl Oncol* 2019;21:1287–301.
- Lee DH. Treatments for EGFR-mutant non-small cell lung cancer (NSCLC): the road to a success, paved with failures. *Pharmacol Ther* 2017;174:1–21.
- Bollinger MK, Agnew AS, Mascara GP. Osimertinib: a third-generation tyrosine kinase inhibitor for treatment of epidermal growth factor receptor-mutated non-small cell lung cancer with the acquired Thr790Met mutation. *J Oncol Pharm Pract* 2018;24:379–88.
- Cross DA, Ashton SE, Ghiorghiu S, et al. AZD9291, an irreversible EGFR TKI, overcomes T790M-mediated resistance to EGFR inhibitors in lung cancer. *Cancer Discov* 2014;4:1046–61.
- Mok TS, Wu Y-L, Ahn M-J, et al. Osimertinib or platinum-pemetrexed in EGFR T790M-positive lung cancer. *N Engl J Med* 2017;376:629–40.
- Soria JC, Ohe Y, Vansteenkiste J, et al. Osimertinib in untreated EGFR-mutated advanced non-small-cell lung cancer. *N Engl J Med* 2018;378:113–25.
- Wu YL, Ahn MJ, Garassino MC, et al. CNS efficacy of osimertinib in patients with T790M-positive advanced non-small-cell lung cancer: data from a randomized phase III trial (AURA3). *J Clin Oncol* 2018;36:2702–9.
- Reungwetwattana T, Nakagawa K, Cho BC, et al. CNS response to osimertinib versus standard epidermal growth factor receptor tyrosine kinase inhibitors in patients with untreated EGFR-mutated advanced non-small-cell lung cancer. *J Clin Oncol* 2018;36:3290–7.
- Ramalingam SS, Vansteenkiste J, Planchard D, et al. Overall survival with osimertinib in untreated, EGFR-mutated advanced NSCLC. *N Engl J Med* 2020;382:41–50.
- Wu YL, Mok TSK, Han JY, et al. Overall survival (OS) from the AURA3 phase III study: Osimertinib vs platinum-pemetrexed (plt-pem) in patients (pts) with EGFR T790M advanced non-small cell lung cancer (NSCLC) and progression on a prior EGFR-tyrosine kinase inhibitor (TKI). *Ann Oncol* 2019;30:abstract 4750.
- Akamatsu H, Katakami N, Okamoto I, et al. Osimertinib in Japanese patients with EGFR T790M mutation-positive advanced non-small-cell lung cancer: AURA3 trial. *Cancer Sci* 2018;109:1930–8.
- Ohe Y, Imamura F, Nogami N, et al. Osimertinib versus standard-of-care EGFR-TKI as first-line treatment for EGFRm advanced NSCLC: FLAURA Japanese subset. *Jpn J Clin Oncol* 2019;49:29–36.
- Ramalingam SS, Yang JC, Lee CK, et al. Osimertinib as first-line treatment of EGFR mutation-positive advanced non-small-cell lung cancer. *J Clin Oncol* 2018;36:841–9.
- Tagrisso Package Insert (Japan). [http://www.pmda.go.jp/PmdaSearch/iyakuDetail/ResultDataSetPDF/670227\\_4291045F1027\\_1\\_08](http://www.pmda.go.jp/PmdaSearch/iyakuDetail/ResultDataSetPDF/670227_4291045F1027_1_08) (6 September 2019, date last accessed).
- Tagrisso Approved in Japan for 1st-line Treatment of EGFR-Mutated Non-Small Cell Lung Cancer. <https://www.astrazeneca.com/media-centre/press-releases/2018/tagrisso-approved-in-japan-for-1st-line-treatment-of-egfr-mutated-non-small-cell-lung-cancer-21082018.html> (6 September 2019, date last accessed).
- PMDA Post-Marketing Surveillance of Drugs. [http://www.jpma.or.jp/english/pari/pdf/2015\\_ch04.pdf](http://www.jpma.or.jp/english/pari/pdf/2015_ch04.pdf) (6 September 2019, date last accessed).
- da Cunha Santos G, Shepherd FA, Tsao MS. EGFR mutations and lung cancer. *Annu Rev Pathol* 2011;6:49–69.
- Melosky B, Hirsh V. Management of common toxicities in metastatic NSCLC related to anti-lung cancer therapies with EGFR-TKIs. *Front Oncol* 2014;4:238.
- Shah RR, Shah DR. Safety and tolerability of epidermal growth factor receptor (EGFR) tyrosine kinase inhibitors in oncology. *Drug Saf* 2019;42:181–98.
- Biswas B, Ghadyalpatil N, Krishna MV, Deshmukh J. A review on adverse event profiles of epidermal growth factor receptor-tyrosine kinase inhibitors in nonsmall cell lung cancer patients. *Indian J Cancer* 2017;54:S55–64.
- Holleman MS, van Tinteren H, Groen HJ, Al MJ, Uyl-de Groot CA. First-line tyrosine kinase inhibitors in EGFR mutation-positive non-small-cell lung cancer: a network meta-analysis. *Oncotargets Ther* 2019;12:1413–21.
- de Marinis F, Wu YL, de Castro G Jr, et al. ASTRIS: a global real-world study of osimertinib in >3000 patients with EGFR T790M positive non-small-cell lung cancer. *Future Oncol* 2019;15:3003–14.
- Takeda M, Okamoto I, Nakagawa K. Pooled safety analysis of EGFR-TKI treatment for EGFR mutation-positive non-small cell lung cancer. *Lung Cancer* 2015;88:74–9.
- Takeda M, Nakagawa K. Toxicity profile of epidermal growth factor receptor tyrosine kinase inhibitors in patients with epidermal growth factor receptor gene mutation-positive lung cancer. *Mol Clin Oncol* 2017;6:3–6.
- Shah RR. Tyrosine kinase inhibitor-induced interstitial lung disease: clinical features, diagnostic challenges, and therapeutic dilemmas. *Drug Saf* 2016;39:1073–91.
- Kawata T, Higashimori M, Itoh Y, et al. Gefitinib exposure and occurrence of interstitial lung disease in Japanese patients with non-small-cell lung cancer. *Cancer Chemother Pharmacol* 2019;83:849–58.
- Gemma A, Kudoh S, Ando M, et al. Final safety and efficacy of erlotinib in the phase 4 POLARSTAR surveillance study of 10 708 Japanese patients with non-small-cell lung cancer. *Cancer Sci* 2014;105:1584–90.
- Tamura K, Nukiwa T, Gemma A, et al. Real-world treatment of over 1600 Japanese patients with EGFR mutation-positive non-small cell lung cancer with daily afatinib. *Int J Clin Oncol* 2019;24:917–26.

31. Akamatsu H, Inoue A, Mitsudomi T, et al. Interstitial lung disease associated with gefitinib in Japanese patients with EGFR-mutated non-small-cell lung cancer: combined analysis of two phase III trials (NEJ 002 and WJTOG 3405). *Jpn J Clin Oncol* 2013;43:664–8.
32. Goto K, Nishio M, Yamamoto N, et al. A prospective, phase II, open-label study (JO22903) of first-line erlotinib in Japanese patients with epidermal growth factor receptor (EGFR) mutation-positive advanced non-small-cell lung cancer (NSCLC). *Lung Cancer* 2013;82:109–14.
33. Yang JC, Ahn MJ, Kim DW, et al. Osimertinib in pretreated T790M-positive advanced non-small-cell lung cancer: AURA study phase II extension component. *J Clin Oncol* 2017;35:1288–96.
34. Goss G, Tsai CM, Shepherd FA, et al. Osimertinib for pretreated EGFR Thr790Met-positive advanced non-small-cell lung cancer (AURA2): a multicentre, open-label, single-arm, phase 2 study. *Lancet Oncol* 2016;17:1643–52.
35. Inoue A, Kobayashi K, Usui K, et al. First-line gefitinib for patients with advanced non-small-cell lung cancer harboring epidermal growth factor receptor mutations without indication for chemotherapy. *J Clin Oncol* 2009;27:1394–400.
36. Carmichael JA, Wing-San Mak D, O'Brien M. A review of recent advances in the treatment of elderly and poor performance NSCLC. *Cancers* 2018;10:E236.
